# Supplementary material for: A rare coding allele in IFIH1 is protective for psoriatic arthritis
Source: PubMed Central journal article supplement (PMC5530346; doi:10.1136/annrheumdis-2016-210592), 2017-06-09
Supplement: annrheumdis-2016-210592supp001.pdf [file annrheumdis-2016-210592supp001.pdf]

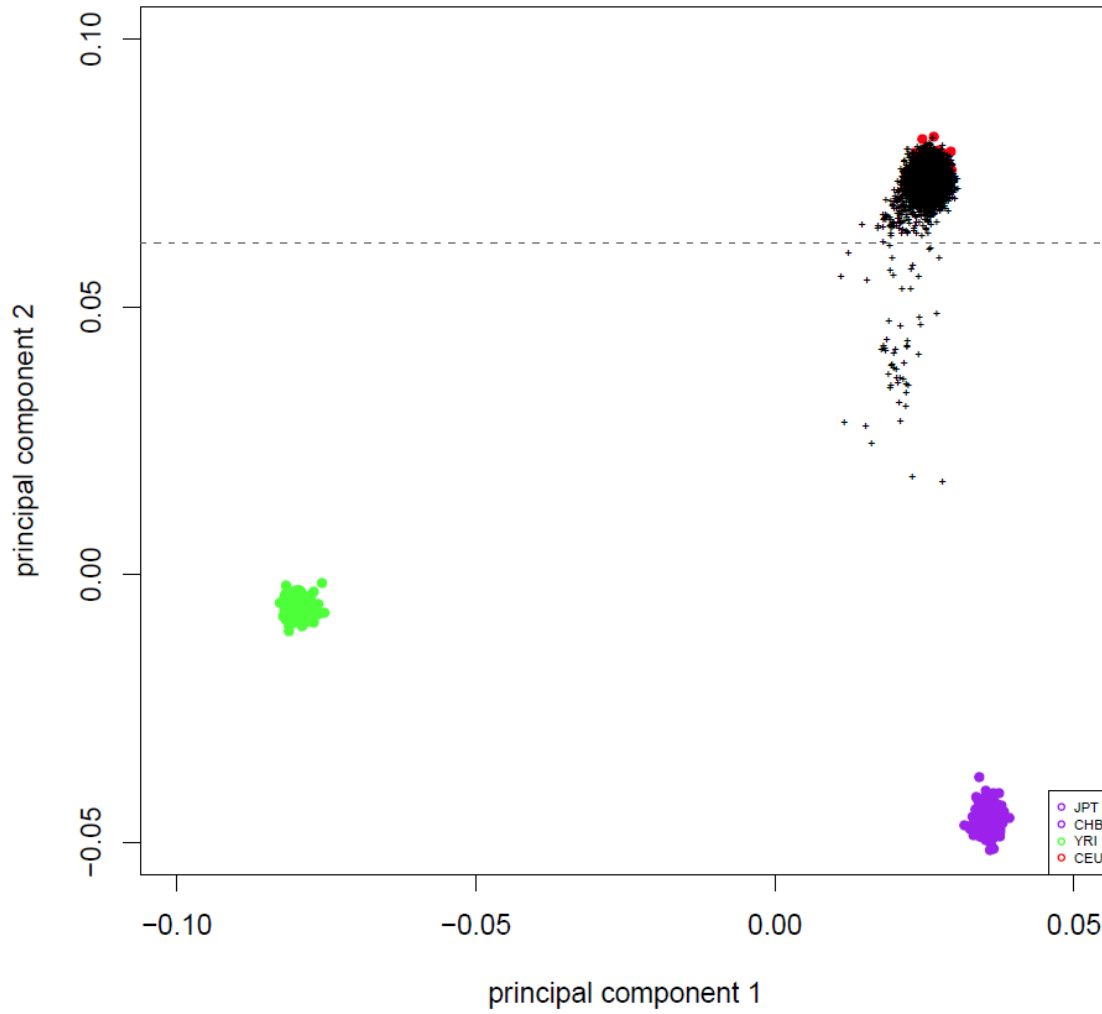

**Supplementary Figure 1:** Principal component analysis of study samples against HapMap population reference panels of Asian (JPT and CHB), African (YRI) and European (CEU) populations. Samples below horizontal dashed line were excluded (second principal component score < 0.062)

+ indicates discovery cohort samples

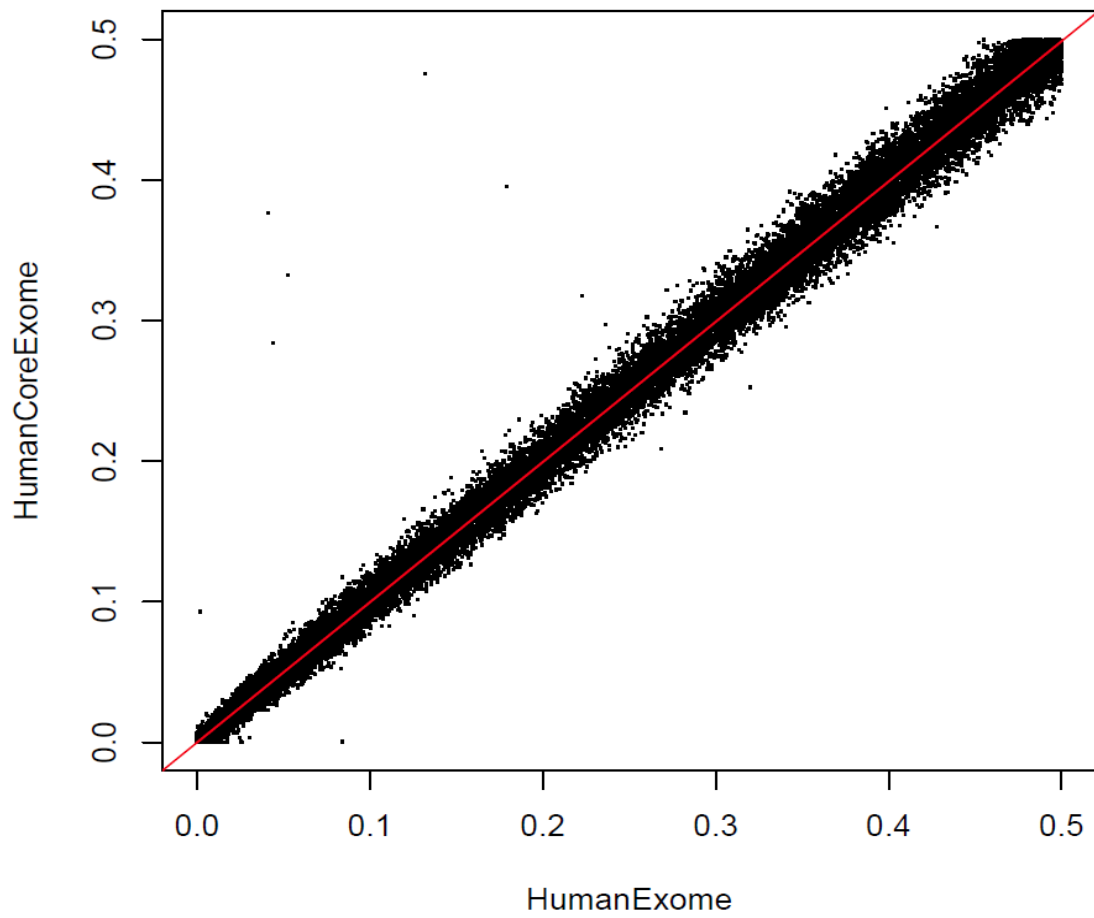

**Supplementary Figure 2:** Scatter plot of correlation of allele frequencies between cases genotyped with the HumanExome chip and HumanCoreExome chip.  $r = 0.99$

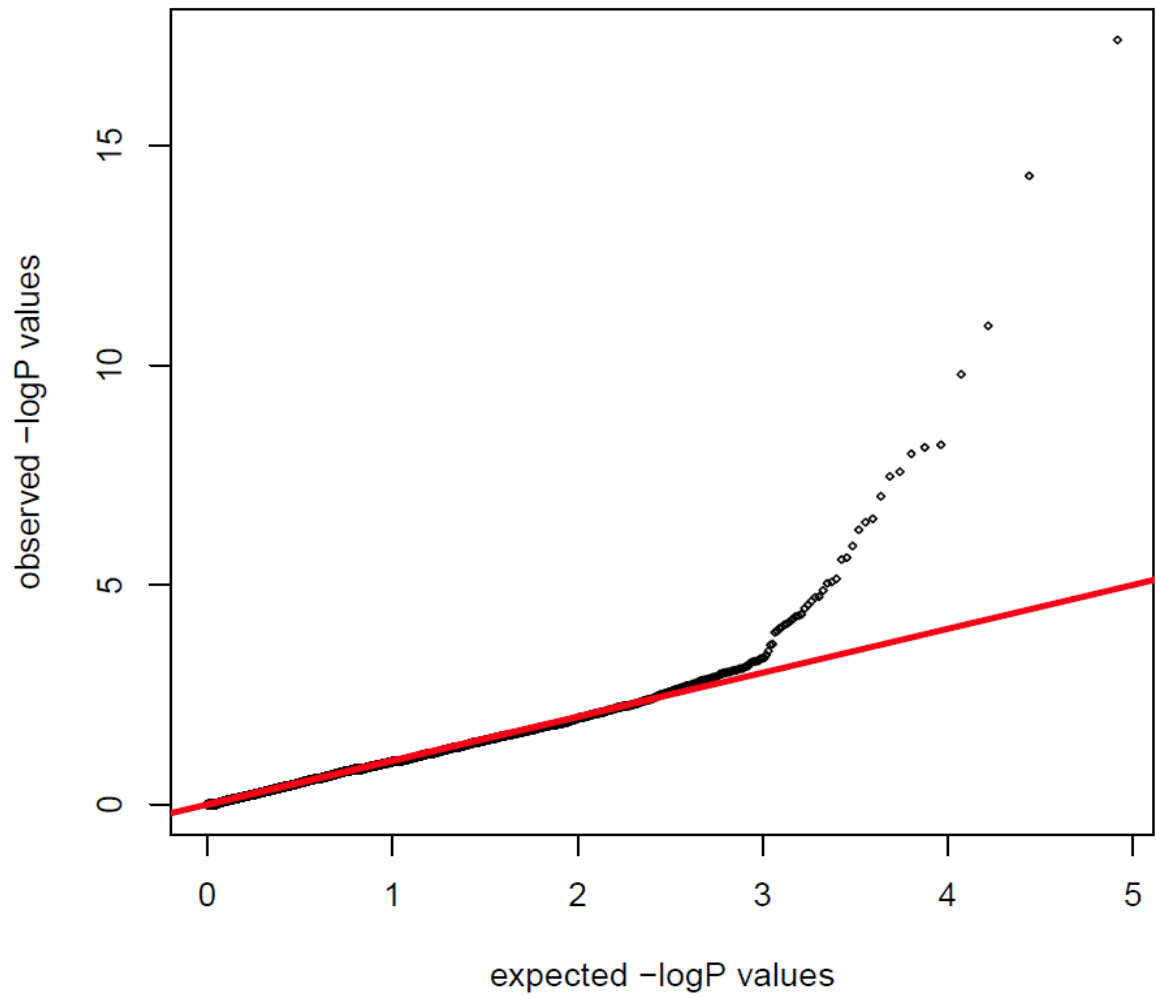

**Supplementary Figure 3:** Quantile-quantile (Q-Q) plot of Fisher's Exact  $P$ -values for common and rare alleles. Genomic inflation factor ( $\lambda$ ) = 0.9

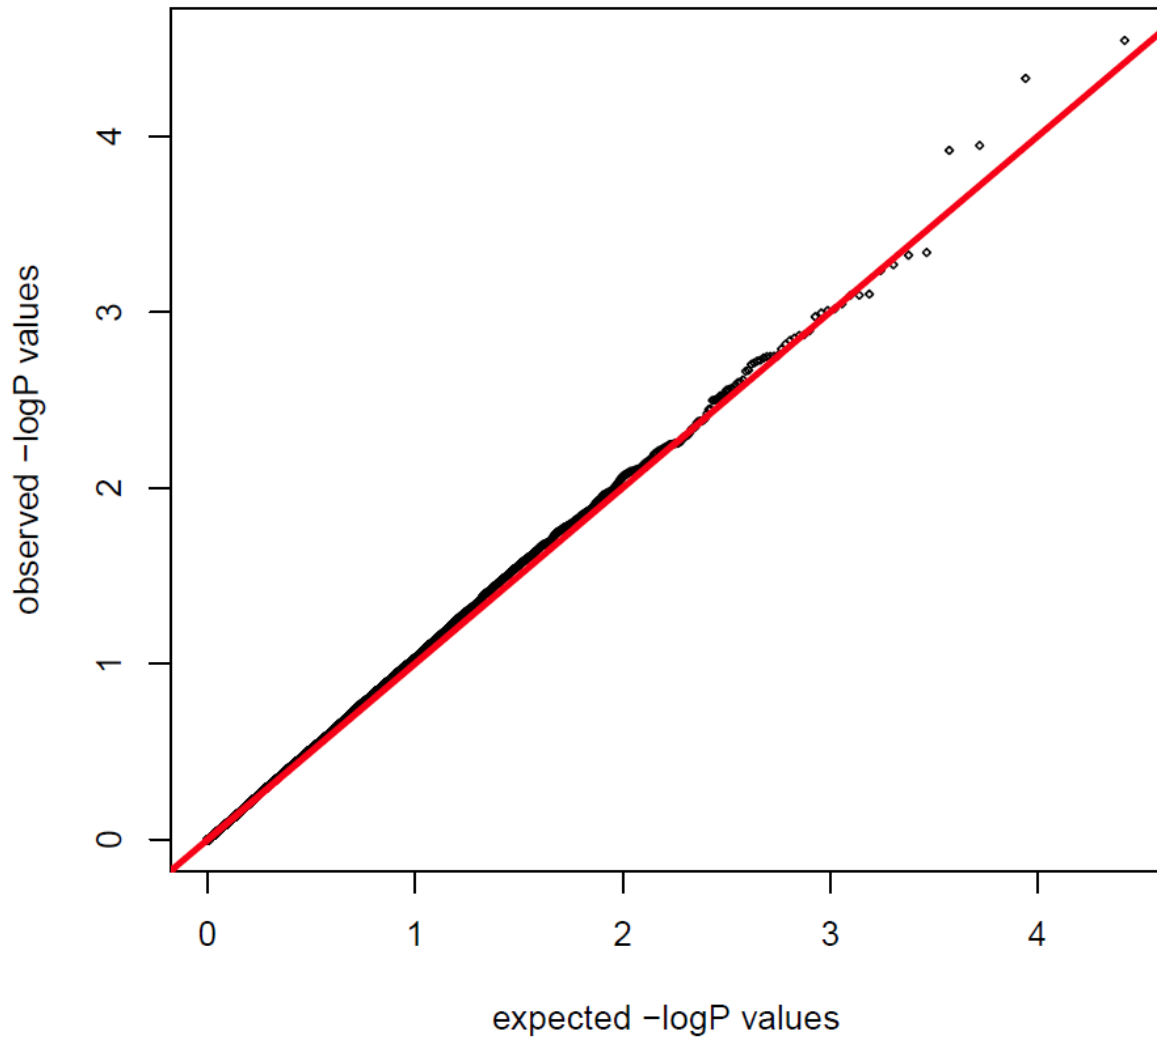

**Supplementary Figure 4:** Quantile-quantile (Q-Q) plot of Fisher's Exact  $P$ -values for common alleles with variants in regions of known association removed ( $n=13,105$ ,  $MAF>0.05$ ). Genomic inflation factor ( $\lambda$ ) = 1.06

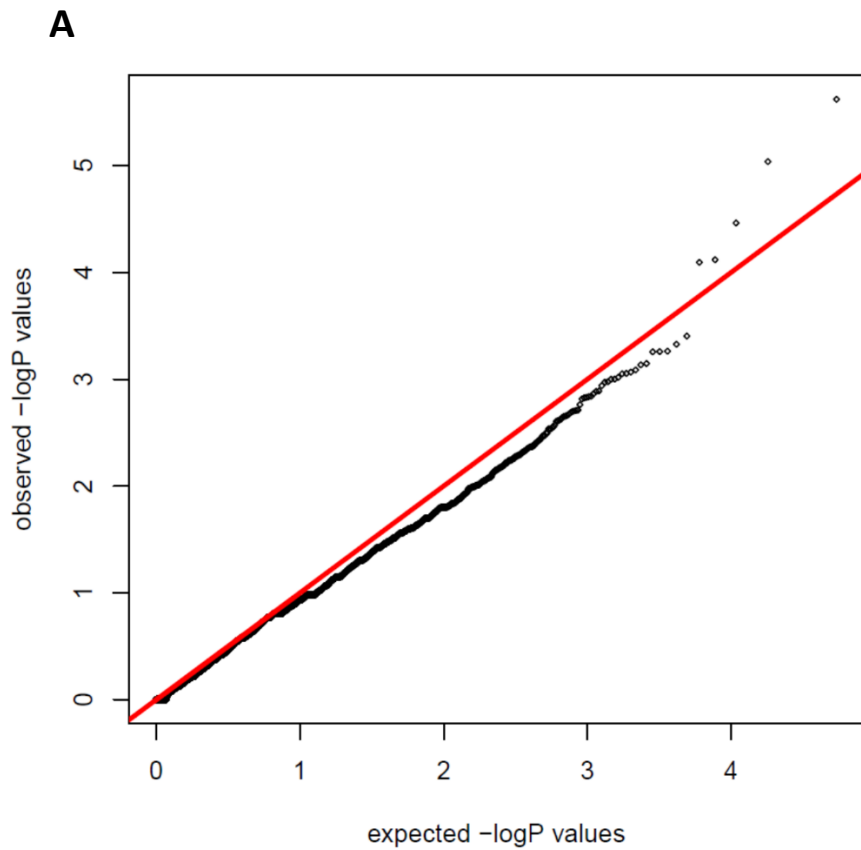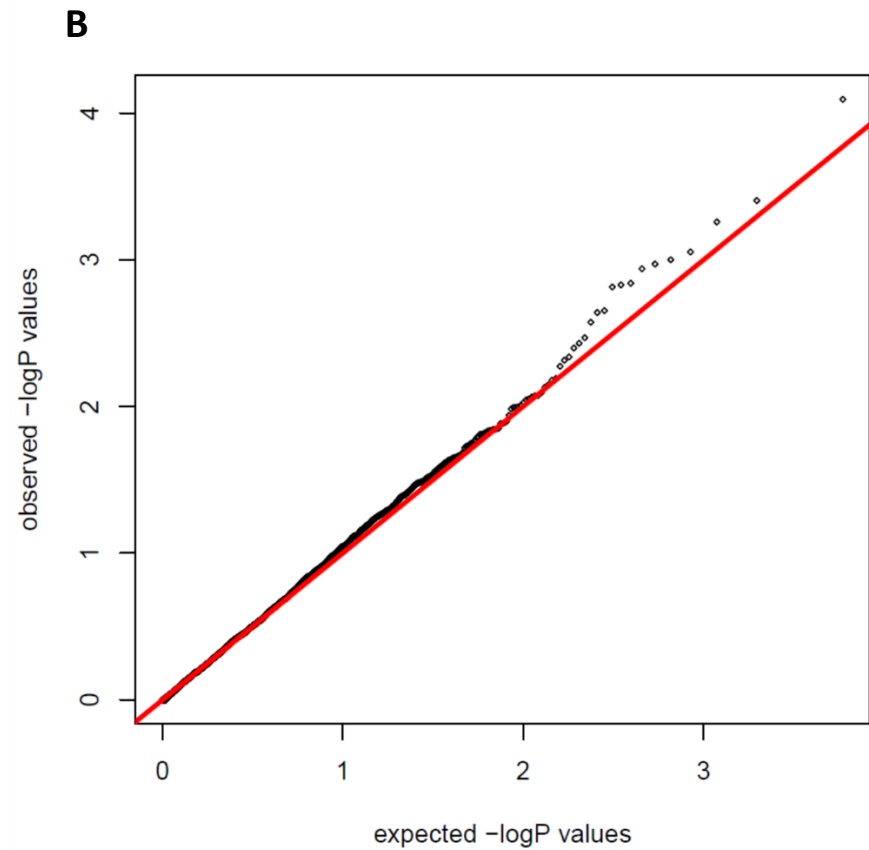

**Supplementary Figure 5:** Quantile-quantile (Q-Q) plot of Fisher's Exact  $P$ -values for rare alleles<sup>a</sup>.

(A) MAF < 0.05. Genomic inflation factor ( $\lambda$ ) = 0.79.

(B) MAF 0.02-0.05 ( $n = 2,960$ ). Genomic inflation factor ( $\lambda$ ) = 1.01.

<sup>a</sup> Deflation observed in the Q-Q plot is due to the large proportion of extremely rare variants (MAF < 0.02)

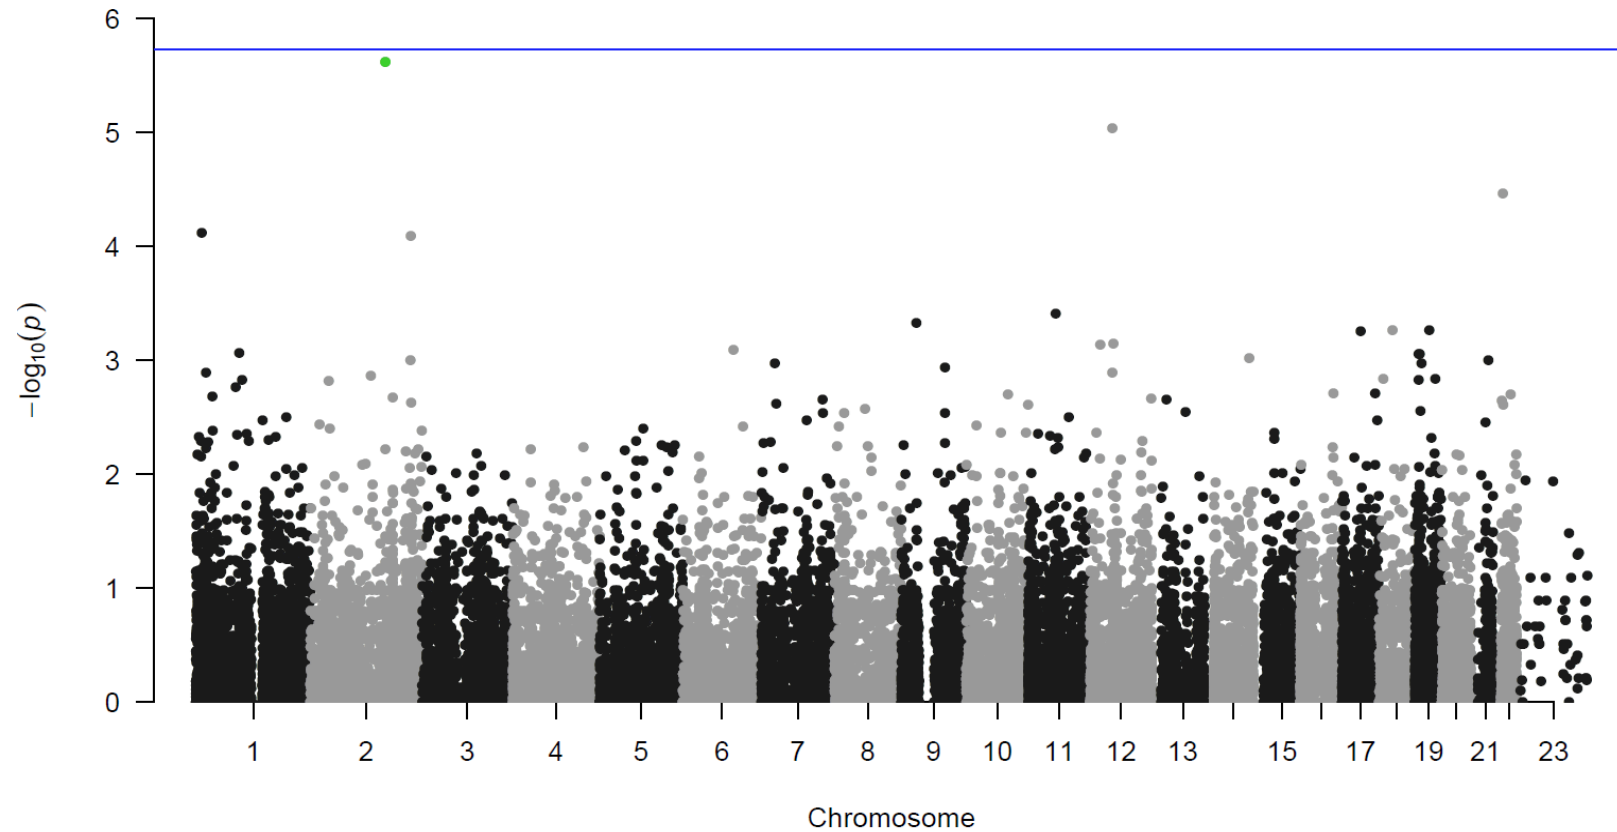

**Supplementary Figure 6:** Manhattan plot of results of single-point analysis of rare (27,066) variants. Chromosomal location is plotted on the x-axis and the  $-\log_{10}$  of the observed  $P$  value is plotted on the y-axis. The most strongly associated variant (Ile923Val) is highlighted in green. The blue line indicates the corrected significance threshold based on the number of markers tested ( $P_{\text{corr}}=1.8 \times 10^{-6}$ ).

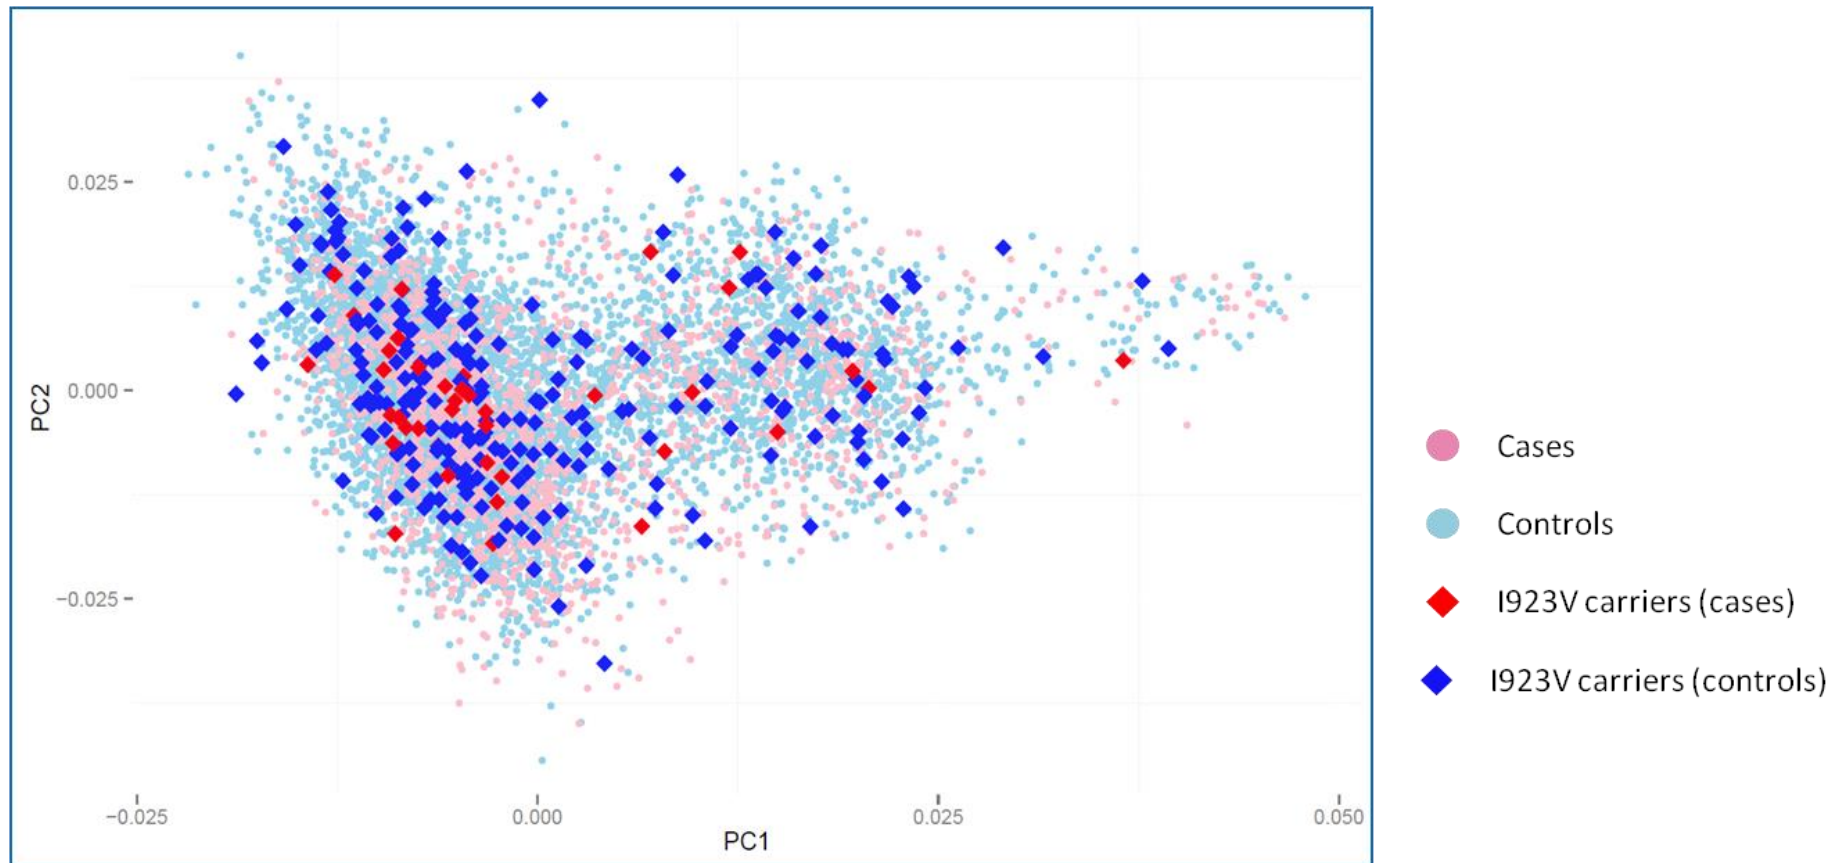

**Supplementary Figure 7:** Here, we plot genotyped individuals as a function of their principal components based on genotype data to identify any evidence of population stratification. We calculated principal components with a set of 13,444 LD pruned variants. We have plotted cases and controls, as well as those who are heterozygous for the *IFIH1* Ile923Val variant, with respect to the first two components.

**Supplementary table 1:** Summary of genes and markers present on the HumanExome chip and the HumanCoreExome chip

|                                      |                         |
|--------------------------------------|-------------------------|
| <b>HumanExome genes (exons)</b>      | <b>18,245 (212,850)</b> |
| <b>HumanExome markers</b>            | 247,870                 |
| <b>HumanCoreExome genes (exons)</b>  | 19,289 (228,271)        |
| <b>HumanCoreExome markers</b>        | 547,644                 |
| <b>Unique HumanExome markers</b>     | 5,152                   |
| <b>Unique HumanCoreExome markers</b> | 304,926                 |
| <b>Overlapping markers</b>           | 242,718                 |

**Supplementary table 2:** Summary of exclusions made during sample quality control within the discovery cohort. QC; quality control

| <b>Sample QC</b>    | <b>Samples remaining</b>                    | <b>Samples excluded</b> |
|---------------------|---------------------------------------------|-------------------------|
| <b>START</b>        | 2,384 cases<br>5,946 controls               |                         |
| Related individuals | 2,324 cases<br>5,917 controls               | 60 cases<br>29 controls |
| Duplicated samples  | 2,030 cases<br>5,917 controls               | 294 cases               |
| Divergent ancestry  | 1,980 cases<br>5,913 controls               | 50 cases<br>4 controls  |
| <b>FINISH</b>       | <b>1,980 cases</b><br><b>5,913 controls</b> |                         |



**Supplementary table 3:** Summary of exclusions made during SNP quality control within the discovery cohort. QC; quality control, MAF; minor allele frequency, MT; mitochondria, HWE; Hardy-Weinberg equilibrium, MHC; major histocompatibility complex

| <b>SNP QC</b>                                      | <b>SNPs remaining</b> | <b>SNPs Excluded</b> |
|----------------------------------------------------|-----------------------|----------------------|
| <b>START</b>                                       | 242, 718              |                      |
| Different MAFs between cases                       | 225,427               | 17,291               |
| Chromosome XY/ Y/MT                                | 224,848               | 579                  |
| Monomorphic                                        | 121,565               | 103,283              |
| Call rate (<1.0)                                   | 48,559                | 73,006               |
| HWE ( $P < 1 \times 10^{-6}$ )                     | 48,081                | 478                  |
| Allele count <1.0                                  | 42,928                | 5,153                |
| Minus MHC region                                   | 41,554                | 1,374                |
| Total excluded                                     |                       | 201,164              |
| <b>FINISH (all variants)</b>                       | <b>41,554</b>         |                      |
| <b>FINISH (rare and low-frequency variants)</b>    | <b>27,353</b>         | 14,201               |
| <b>FINISH (Minus differences in allele counts)</b> | <b>27,066</b>         | 287                  |

**Supplementary table 4:** Summary statistics of common variants identified at previously reported PsA and psoriasis GWAS loci (Fisher's Exact test). <sup>a</sup>allele labels are given in relation to the forward strand, Chr; chromosome, MAF; minor allele frequency, OR; odds ratio (in reference to the minor allele)

| SNP        | Chr | Position (HG19) | Minor/major allele <sup>a</sup> | MAF (case) | MAF (control) | P value                | Allelic OR            | Gene                | Amino acid change   | Stuart SNP <sup>1</sup> | r <sup>2</sup> Stuart SNP <sup>1</sup> |
|------------|-----|-----------------|---------------------------------|------------|---------------|------------------------|-----------------------|---------------------|---------------------|-------------------------|----------------------------------------|
| rs33980500 | 6   | 111913262       | T/C                             | 0.11       | 0.07          | 3.88x10 <sup>-18</sup> | 1.74<br>(1.54 - 1.97) | <i>TRAF3IP2-AS1</i> | D10N<br>(Missense)  | rs33980500              | 1.00                                   |
| rs11209003 | 1   | 67601132        | T/G                             | 0.35       | 0.29          | 1.26x10 <sup>-11</sup> | 1.31<br>(1.21 - 1.41) | <i>IL23R</i>        | Intergenic          | rs12044149              | 0.81                                   |
| rs6871626  | 5   | 158826792       | A/C                             | 0.29       | 0.34          | 1.03x10 <sup>-8</sup>  | 0.80<br>(0.74 - 0.86) | <i>IL12B</i>        | Intergenic          | rs918520                | 0.11                                   |
| rs2066807  | 12  | 56740682        | G/C                             | 0.04       | 0.07          | 9.58x10 <sup>-8</sup>  | 0.65<br>(0.55 - 0.76) | <i>STAT2</i>        | M594I<br>(Missense) | rs2066807               | 1.00                                   |
| rs20541    | 5   | 131995964       | A/G                             | 0.14       | 0.18          | 3.74x10 <sup>-7</sup>  | 0.77<br>(0.70 - 0.86) | <i>IL13</i>         | Q144R<br>(Missense) | rs1295685               | 0.98                                   |
| rs35667974 | 2   | 163124637       | G/A                             | 0.01       | 0.02          | 2.39x10 <sup>-6</sup>  | 0.47<br>(0.33 - 0.66) | <i>IFIH1</i>        | I923V<br>(Missense) | rs1990760               | 0.02                                   |
| rs2304256  | 19  | 10475652        | A/C                             | 0.25       | 0.29          | 2.65x10 <sup>-6</sup>  | 0.82<br>(0.76 - 0.89) | <i>TYK2</i>         | V362F<br>(Missense) | rs34536443              | 0.08                                   |
| rs10903122 | 1   | 25303576        | A/G                             | 0.46       | 0.50          | 1.34x10 <sup>-5</sup>  | 0.85<br>(0.79 - 0.92) | <i>RUNX3</i>        | Intergenic          | rs11249215              | 0.89                                   |
| rs2235617  | 20  | 48554977        | C/G                             | 0.38       | 0.42          | 1.85x10 <sup>-5</sup>  | 0.85<br>(0.79 - 0.92) | <i>RNF114</i>       | Silent              | rs2235617               | 1.00                                   |
| rs10865331 | 2   | 62551472        | A/G                             | 0.41       | 0.37          | 2.33x10 <sup>-5</sup>  | 1.17<br>(1.09 - 1.26) | <i>B3GNT2</i>       | Intergenic          | rs10865331              | 1.00                                   |
| rs4795067  | 17  | 26106675        | G/A                             | 0.39       | 0.35          | 5.03x10 <sup>-5</sup>  | 1.17<br>(1.08 - 1.26) | <i>NOS2</i>         | Intergenic          | rs28998802              | 0.03                                   |
| rs702873   | 2   | 61081542        | A/G                             | 0.39       | 0.42          | 5.27x10 <sup>-05</sup> | 0.86<br>(0.80 - 0.92) | <i>FLJ16341</i>     | Silent              | rs34958906              | 0.99                                   |
| rs610604   | 6   | 138199417       | C/A                             | 0.36       | 0.32          | 9.69x10 <sup>-5</sup>  | 1.16<br>(1.08 - 1.26) | <i>TNFAIP3</i>      | Silent              | rs610604                | 1.00                                   |
| rs8016947  | 14  | 35832666        | T/G                             | 0.41       | 0.44          | 9.61x10 <sup>-4</sup>  | 0.88<br>(0.82 - 0.95) | <i>NFKBIA</i>       | Intergenic          | rs12883343              | 0.44                                   |

|             |    |          |     |      |      |                       |                       |                    |                      |            |      |
|-------------|----|----------|-----|------|------|-----------------------|-----------------------|--------------------|----------------------|------------|------|
| rs30187     | 5  | 96124330 | T/C | 0.36 | 0.34 | 1.24x10 <sup>-3</sup> | 1.13<br>(1.05 - 1.22) | <i>ERAP1</i>       | K528R<br>(Missense)  | rs30377    | 0.45 |
| rs181359    | 22 | 21928641 | T/C | 0.22 | 0.19 | 1.25x10 <sup>-3</sup> | 1.16<br>(1.06 - 1.27) | <i>UBE2L3</i>      | Silent               | rs5754387  | 0.97 |
| rs8102380   | 19 | 10801185 | G/A | 0.32 | 0.34 | 3.98x10 <sup>-3</sup> | 0.89<br>(0.83 - 0.96) | <i>ILF3</i>        | Silent               | rs873016   | 0.54 |
| rs149000560 | 11 | 63974966 | A/G | 0.01 | 0.01 | 4.77x10 <sup>-3</sup> | 1.66<br>(1.18 - 2.35) | <i>FERMT3</i>      | G44R<br>(Missense)   | rs887314   | 0.01 |
| rs12928822  | 16 | 11403893 | T/C | 0.17 | 0.19 | 6.13x10 <sup>-3</sup> | 0.88<br>(0.80 - 0.96) | <i>PRM3, SOCS1</i> | Intergenic           | rs413024   | 0.39 |
| rs6908425   | 6  | 20728731 | T/C | 0.20 | 0.22 | 0.02                  | 0.90<br>(0.82 - 0.98) | <i>CDKAL1</i>      | Silent               | rs4712528  | 0.97 |
| rs11538189  | 1  | 24710405 | G/A | 0.12 | 0.13 | 0.03                  | 0.89<br>(0.80 - 0.99) | <i>C1orf201</i>    | M93T<br>(Missense)   | rs7540214  | 0.02 |
| rs10462021  | 1  | 7897133  | G/A | 0.21 | 0.19 | 0.04                  | 1.10<br>(1.00 - 1.20) | <i>PER3</i>        | H1149R<br>(Missense) | rs12041676 | 0.01 |
| rs2075641   | 10 | 75562108 | A/G | 0.12 | 0.13 | 0.04                  | 0.89<br>(0.80 - 1.00) | <i>NDST2</i>       | Silent               | rs2675669  | 0.15 |

<sup>1</sup> Stuart PE, Nair RP, Tsoi LC et al. Genome-wide Association Analysis of Psoriatic Arthritis and Cutaneous Psoriasis Reveals Differences in Their Genetic Architecture. *Am J Hum Genet* 2015;**97**:816-36.

**Supplementary table 5:** Summary statistics of the strongest associations identified ( $P < 1.0 \times 10^{-4}$ ) when analysing rare variants (Fisher's Exact test). <sup>a</sup>allele labels are given in relation to the forward strand, Chr; chromosome, MAF; minor allele frequency, OR; odds ratio (in reference to the minor allele), EC; HumanExome chip, HCE; HumanCoreExome chip

| SNP         | Chr | Position (HG19) | Minor/major allele <sup>a</sup> | MAF (case) | MAF (control) | P value               | Allelic OR            | Gene            | Allele count: 686 EC cases | Allele count: 1294 HCE cases | Allele count: 5913 controls | Amino acid change   |
|-------------|-----|-----------------|---------------------------------|------------|---------------|-----------------------|-----------------------|-----------------|----------------------------|------------------------------|-----------------------------|---------------------|
| rs35667974  | 2   | 163124637       | C/T                             | 0.010      | 0.021         | $2.39 \times 10^{-6}$ | 0.47<br>(0.33 - 0.66) | <i>IFIH1</i>    | 16                         | 23                           | 246                         | I923V<br>(Missense) |
| rs148755202 | 12  | 48191247        | T/C                             | 0.010      | 0.020         | $9.17 \times 10^{-6}$ | 0.48<br>(0.34 - 0.68) | <i>HDAC7</i>    | 10                         | 29                           | 238                         | R166H<br>(Missense) |
| rs138601828 | 22  | 21800049        | A/G                             | 0.007      | 0.002         | $3.44 \times 10^{-5}$ | 3.24<br>(1.88 - 5.59) | <i>HIC2</i>     | 7                          | 20                           | 25                          | V289I<br>(Missense) |
| rs41303871  | 1   | 12836101        | A/C                             | 0.016      | 0.008         | $7.61 \times 10^{-5}$ | 1.94<br>(1.41 - 2.66) | <i>PRAMEF12</i> | 22                         | 41                           | 98                          | L235I<br>(Missense) |
| rs41272679  | 2   | 218762616       | T/C                             | 0.051      | 0.036         | $8.05 \times 10^{-5}$ | 1.43<br>(1.20 - 1.69) | <i>TNS1</i>     | 65                         | 137                          | 430                         | V25I<br>(Missense)  |

**Supplementary table 6:** Summary statistics for the association at rs35667974 within the discovery and replication cohorts. <sup>a</sup>allele labels are given in relation to the forward strand, Chr; chromosome, MAF; minor allele frequency, OR; odds ratio (in reference to the minor allele)

|                |                                       |                   |                      |                       |                    | <b>Genotype counts (CC/CT/TT)</b> |                 |
|----------------|---------------------------------------|-------------------|----------------------|-----------------------|--------------------|-----------------------------------|-----------------|
| <b>Dataset</b> | <b>Minor/major allele<sup>a</sup></b> | <b>MAF (case)</b> | <b>MAF (control)</b> | <b>P value</b>        | <b>Allelic OR</b>  | <b>Cases</b>                      | <b>Controls</b> |
| Discovery      | C/T                                   | 0.010             | 0.021                | 2.39x10 <sup>-6</sup> | 0.47 (0.33 - 0.66) | 0/39/1941                         | 2/242/5669      |
| Replication    | C/T                                   | 0.008             | 0.018                | 3.50x10 <sup>-5</sup> | 0.49 (0.34 - 0.70) | 0/36/2198                         | 0/203/5505      |

**Supplementary table 7:** Summary statistics for variants investigated within the replication cohort. <sup>a</sup>allele labels are given in relation to the forward strand, Chr; chromosome, MAF; minor allele frequency, OR; odds ratio (in reference to the minor allele), \*variant not available for analysis

| SNP         | Chr | Position (HG19) | Minor/major allele <sup>a</sup> | MAF (case) | MAF (control) | P value               | Allelic OR            | <i>P</i> <sub>Discovery</sub> | Gene            | Amino acid change    |
|-------------|-----|-----------------|---------------------------------|------------|---------------|-----------------------|-----------------------|-------------------------------|-----------------|----------------------|
| rs35667974  | 2   | 163124637       | C/T                             | 0.008      | 0.018         | 3.50x10 <sup>-5</sup> | 0.49<br>(0.34 - 0.70) | 2.39x10 <sup>-6</sup>         | <i>IFIH1</i>    | I923V<br>(Missense)  |
| rs35018800  | 19  | 10464843        | A/G                             | 0.004      | 0.008         | 0.04                  | 0.61<br>(0.36 - 0.98) | 8.89x10 <sup>-4</sup>         | <i>TYK2</i>     | A928V<br>(Missense)  |
| rs61752945  | 9   | 32481339        | T/C                             | 0.008      | 0.010         | 0.12                  | 0.75<br>(0.51 - 1.08) | 4.71x10 <sup>-4</sup>         | <i>DDX58</i>    | R546Q<br>(Missense)  |
| rs35508987  | 17  | 40997461        | A/G                             | 0.012      | 0.009         | 0.13                  | 1.30<br>(0.92 - 1.82) | 5.55x10 <sup>-4</sup>         | <i>AOC2</i>     | R273Q<br>(Missense)  |
| rs11575194  | 2   | 217543728       | A/G                             | 0.047      | 0.044         | 0.26                  | 1.10<br>(0.93 - 1.30) | 9.98x10 <sup>-4</sup>         | <i>IGFBP5</i>   | R138W<br>(Missense)  |
| rs41303871  | 1   | 12836101        | A/C                             | 0.010      | 0.008         | 0.28                  | 1.23<br>(0.84 - 1.77) | 7.61x10 <sup>-5</sup>         | <i>PRAMEF12</i> | L235I<br>(Missense)  |
| rs146045772 | 19  | 31040226        | G/C                             | 0.006      | 0.005         | 0.30                  | 1.28<br>(0.80 - 2.02) | 5.46x10 <sup>-4</sup>         | <i>ZNF536</i>   | (H1234D)<br>Missense |
| rs41288586  | 6   | 110636603       | T/C                             | 0.004      | 0.006         | 0.50                  | 0.84<br>(0.49 - 1.38) | 8.18x10 <sup>-4</sup>         | <i>METTL24</i>  | (D167N)<br>Missense  |
| rs148755202 | 12  | 48191247        | T/C                             | 0.015      | 0.017         | 0.52                  | 0.91<br>(0.68 - 1.20) | 9.17x10 <sup>-6</sup>         | <i>HDAC7</i>    | (R166H)<br>Missense  |
| rs2336573   | 19  | 8367709         | T/C                             | 0.037      | 0.034         | 0.56                  | 1.06<br>(0.88 - 1.27) | 8.84x10 <sup>-4</sup>         | <i>CD320</i>    | (G220R)<br>Missense  |
| rs41272679  | 2   | 218762616       | T/C                             | 0.036      | 0.040         | 0.59                  | 0.95<br>(0.79 - 1.14) | 8.05x10 <sup>-5</sup>         | <i>TNS1</i>     | (V25I)<br>Missense   |
| rs117474773 | 12  | 21689946        | G/A                             | 0.007      | 0.007         | 0.69                  | 0.92<br>(0.60 - 1.37) | 7.34x10 <sup>-4</sup>         | <i>GYS2</i>     | (F685S)<br>Missense  |
| rs138601828 | 22  | 21800049        | A/G                             | 0.006      | 0.005         | 0.74                  | 0.92<br>(0.56 - 1.47) | 3.44x10 <sup>-5</sup>         | <i>HIC2</i>     | (V289I)<br>Missense  |

|              |    |          |     |       |       |      |                       |                       |                |                      |
|--------------|----|----------|-----|-------|-------|------|-----------------------|-----------------------|----------------|----------------------|
| rs1800555    | 1  | 94463617 | T/C | 0.012 | 0.012 | 0.77 | 1.05<br>(0.75 – 1.45) | 8.58x10 <sup>-4</sup> | <i>ABCA4</i>   | (D2177N)<br>Missense |
| rs12787462   | 11 | 59573980 | T/C | 0.027 | 0.027 | 0.80 | 1.03<br>(0.83 – 1.27) | 3.94x10 <sup>-4</sup> | <i>MRPL16</i>  | (R199Q)<br>Missense  |
| rs7236477*   | 18 | 28902322 | G/A |       |       |      |                       | 5.51x10 <sup>-4</sup> | <i>DSG1</i>    | Silent               |
| rs191603809* | 12 | 50187579 | A/C |       |       |      |                       | 7.13x10 <sup>-4</sup> | <i>NCKAP5L</i> | (A1066S)<br>Missense |
| rs147639735  | 14 | 96730141 | T/C | 0.000 | 0.000 | NA   | NA                    | 9.59x10 <sup>-4</sup> | <i>BDKRB1</i>  | (P41L)<br>Missense   |

**Supplementary table 8:** Summary statistics of *IFIH1* variants from single-variant analysis (Fisher's Exact), that were included in the multiple-variant analysis. <sup>a</sup>allele labels are given in relation to the forward strand, Chr; chromosome, MAF; minor allele frequency, OR; odds ratio (in reference to the minor allele).

| SNP        | Chr | Position (HG19) | Minor/major allele <sup>a</sup> | MAF (case) | MAF (control) | P value               | Allelic OR         | Amino acid change |
|------------|-----|-----------------|---------------------------------|------------|---------------|-----------------------|--------------------|-------------------|
| rs35667974 | 2   | 163124637       | C/T                             | 0.010      | 0.021         | 2.39x10 <sup>-6</sup> | 0.47 (0.33 - 0.66) | I923V (Missense)  |
| rs35732034 | 2   | 163124596       | T/C                             | 0.006      | 0.009         | 0.04                  | 0.62 (0.39 - 0.97) | Silent            |
| rs35744605 | 2   | 163134090       | A/C                             | 0.004      | 0.007         | 0.06                  | 0.59 (0.34 - 1.01) | E627X (Nonsense)  |
| rs79324540 | 2   | 163128828       | T/C                             | 0.001      | 0.002         | 0.82                  | 0.79 (0.29 - 2.11) | E842K (Missense)  |
| rs72650663 | 2   | 163133396       | A/G                             | 0.004      | 0.003         | 0.88                  | 1.05 (0.57 - 1.92) | T702I (Missense)  |
